# Supplementary material
Source: MDPI journal article supplement (https://www.mdpi.com/2073-4441/10/2/185)
Supplement: s1 [file s1]

Article

Soil media CO2 and N2O fluxes dynamics from sand-based roadside bioretention systems

Paliza Shrestha 1, Stephanie E. Hurley 1 and Elizabeth Carol Adair 2

1 Department of Plant and Soil Science, University of Vermont, Burlington, VT 05405, USA; Stephanie.Hurley@uvm.edu

2 Rubenstein School of Environment and Natural Resources, University of Vermont, Burlington, VT 05405, USA; Carol.Adair@uvm.edu

***** Correspondence: pshresth@uvm.edu, Tel.: +1-802-656-2630

Received: 03 January 2018; Accepted: 01 February 2018; Published: date

Supplement Table 1. List of bioretention plant species.

|  | **Latin Name** | **Common Name** |
| --- | --- | --- |
| Low diversity (VL) cell | *Hemerocallis spp.* | Daylilies 'Stella d'Oro' (4*) |
| *Panicum virgatum* | Switchgrass 'Shenandoah' (5) |
| High diversity (VH) cell | *Aesclepius incarnata* | Butterfly, Milkweed 'Tuberosa' (1*) |
| *Anemone canadensis* | Windflower (2) |
| *Aquilegia canadensis* | Columbine (2) |
| *Symphyotrichum novae-angliae* | New England Aster 'Purple Dome' (2) |
| *Baptisia australis* | Blue False Indigo 'Capsian' and 'Midnight Prairiebliss' (3) |
| *Helenium autumnale* | Sneezeweed 'Red+Gold' (4) |
| *Lobeliea cardinalis* | Cardinal Flower (1) |

*Numbers inside parenthesis indicate number of individuals planted per cell.

Supplement 2. Greenhouse gas flux calculation equations.

PAS flux calculation (used by Kaye, McCulley, Castellano, Adviento-Borbe Labs)

The method uses numbers (density, temperature, air pressure) based on 20°C and 1 atm and not the actual air temperature and pressure because the PAS instrument calculates the concentration of each gas at 20°C. Fluxes of CO2 and N2O are computed by fitting a linear regression of gas concentration against time after chamber closure.

According to the PAS manual (14.11.2) to convert ppm (volume) to mg/m3:

where 1 mol per 24.04 m3 is the density of gas at 20°C and 0.101 MPa (ρ). Convert ppm to mg/m3 using the above equation, then calculate the flux as below to get CO2-C or N2O-N in mg/(m2*sec):

where *F* is the gas production rate (mg m−2 sec−1), Δ*C*/Δ*t* denotes the increase/decrease of gas concentration in the chamber (mg m-3 sec−1 ), *V* is the chamber volume (in m3), *A* is the chamber soil surface area (in m2), and α is a conversion coefficient (28/44 for N2O-N; 12/44 for CO2-C).

Example calculation: slope*44*(1/24.04)*0.17779*(12/44)*60*60

molecular weight of gas = 44 (CO2 or N2O)

1/24.04 = PAS conversion (see above)

chamber m3/m2 = 0.17779

12/44 = conversion to CO2-C

*60*60 converts from seconds to hour

**Supplement 3.** Chloroform-fumigation extraction method.

Following GHG sampling, three random subsamples of soil was collected from the ambient high and low diversity vegetation plots (V1 and V2) for soil microbial biomass (SMB) carbon (C) determination monthly from May to November in 2015. Monthly SMB was also measured in year 2014. Chloroform fumigation-incubation method (Vance et al. 1987, Jenkinson and Powlson 1976) was used to determine SMB. Analysis was done on field-moist soil within several hours from collection. Chloroform fumigation is done to kill and lyse microbial cell membranes in the soil sample. Soils (11-12 grams) for fumigation were placed into 50 ml beakers and put in a vacuum desiccator. 20 ml of chloroform and some boiling chips were added to a beaker and placed in the center of the desiccator. The dessicator was sealed and evacuated using a vacuum pump for 2-3 minutes causing the chloroform to boil, exposing the samples to chloroform vapor (Alessi et al. 2011). This was followed by release of the vacuum to vent the desiccator. This step was repeated five times, not venting the last time. The desiccator was left under vacuum and stored in a dark box for 5 days before the vacuum was released again. Non-fumigated samples (10-11 grams) were weighted into 50 ml beakers but not fumigated. Chloroform fumigated and non-fumigated (control) soils were extracted with 50 ml of 0.5 M K2SO4. After shaking using a mechanical shaker and settling, the samples were passed through a pre-wetted (with 0.5 M K2SO4) Whatman 1 filter paper. The filtrate was frozen until ready to be determined for total organic carbon (TOC) on the TOC analyzer (TOC-L Shimadzu TOC Analyzer, Shimadzu Corporation). Control blanks containing only 0.5 M K2SO4 were included with every batch of samples. Blanks were subtracted from the data to correct for any background C present in the reagent. The difference in TOC between the chloroform-fumigated and non-fumigated soils is the chloroform-labile C pool (EC), and is proportional to microbial biomass C (Vance et al. 1987, Allison 2008). Moisture-correction was done for each sample to correct for differences in soil water content and to express final results in dry weight equivalents.

**Supplement 4 Fig. 1.** Soil NH4+ and NO3-concentrations averaged across three sampling dates (June 9, July 28, and November 2, 2016). VL= vegetation low diversity, VH= vegetation high diversity, RR= enhanced rainfall+runoff, SM= SorbtiveMediaTM.

**Supplement 5.** Estimation of carbon and nitrogen stocks in soil media layers, microbial biomass and plants.

Soil

Total volume of upper 30 cm soil media and lower 30 cm soil media = 1132674 cm3

Total weight of upper 30 cm soil media = 1347.882 kg, given the bulk density 1.19 g cm-3 (bulk density here is average bulk density and empirically derived from soil measurements taken on two separate occasions)

Total weight of lower 30 cm soil media = 1800.951 kg, given the bulk density 1.59 g cm-3 (bulk density here is taken from USDA NRCS laboratory data[[1]](#footnote-1))

Plants

Total cell area = 3.72 m2

*Panicum* (switchgrass) coverage of cell area: 55% of 3.72 = 2.046 m2

*Hemerocallis* (daylily) coverage of cell area: 45% of 3.72 = 1.674 m2

Total biomass of *Panicum* per year = 10 kg m-2 (extrapolated from Heaton et al., 2004)

Total biomass of *Hemerocallis* per year = 5 kg m-2 (assumed to be half of *Panicum* as their height is measured to be half as well)

Total biomass of *Panicum* at plot coverage level = 20.46 kg (2.046 m-2 x 10 kg m-2)

Total biomass of *Hemerocallis* at plot coverage level = 8.37 kg (1.674 m-2 x 5 kg m-2)

Average *Panicum* C & N concentration: 453.5 and 8.625 g kg-1 dry plant

Average *Hemerocallis* C & N concentration: 447 and 17.18 g kg-1 dry plant

Loss from gas fluxes

CO2 flux:

Average flux is 194±7 mg m2 hr-1

Average loss of C from CO2 flux at plot level of 3.72 m2 per day = 17.32 g

N2O flux:

Average flux is 0.01±0.02 mg m2 hr-1

Average loss of N from N2O flux at plot level per day = 0.893 mg

**Supplement 6.** Soil C and N content (g kg-1 dry soil) and CN ratio measured from the top 10 cm of the bioretention soil media in year 2014 and 2016.

|  |  | **2014** | |  | **2016** | |  |
| --- | --- | --- | --- | --- | --- | --- | --- |
| *Trt | n | C | N | CN ratio | C | N | CN ratio |
| VH | 2 | 17.78 | 1.63 | 11.1 | 16.66 | 1.055 | 15.8 |
| VH RR | 2 | 18.9 | 1.66 | 11.7 | 17.355 | 1.15 | 15.25 |
| VH SM | 1 | 15.57 | 1.49 | 10.4 | 14.65 | 0.94 | 15.6 |
| VH SMRR60 | 1 | 17.34 | 1.64 | 10.6 | 13.76 | 0.82 | 16.8 |
| VL | 2 | 18.36 | 1.69 | 10.85 | 14.17 | 0.9 | 15.75 |

*VH = high diversity, RR= rainfall and runoff, SM= SorbtiveMediaTM, VL= low diversity

1. https://www.nrcs.usda.gov/wps/portal/nrcs/detail/soils/survey/office/ssr10/tr/?cid=nrcs144p2_074844 [↑](#footnote-ref-1)
